# Supplementary material for: The Impact of High-Intensity Ultrasound-Assisted Extraction on the Structural and Functional Properties of Hempseed Protein Isolate (HPI)
Source: MDPI journal article supplement (doi:10.3390/foods12020348), 2023-01-11
Supplement: s1 [file s1]

## Supplementary Materials

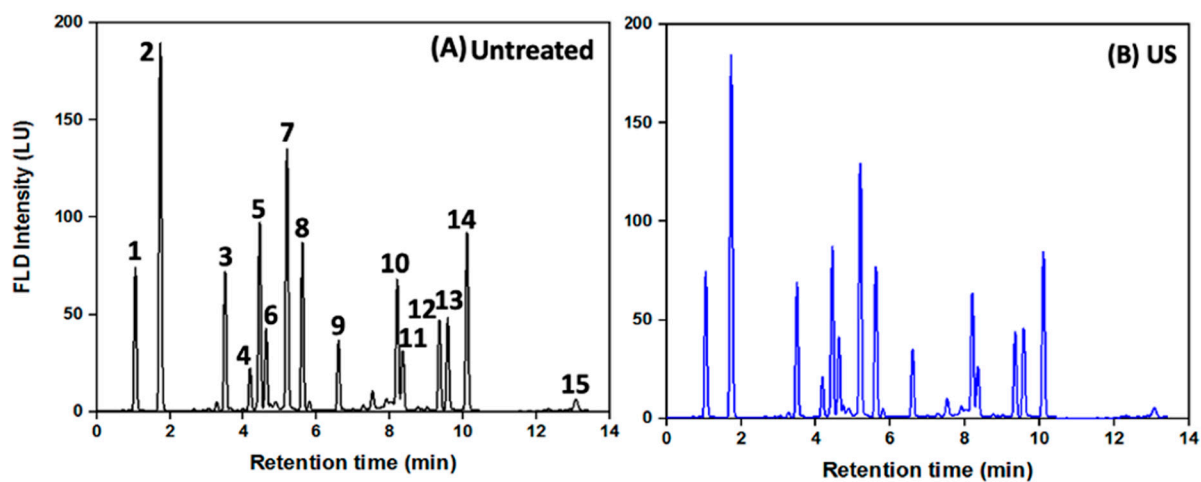

Figure S1. (A) The amino acid profile of conventionally extracted HPI sample; (B) The amino acid profile of HIU-treated HPI sample.

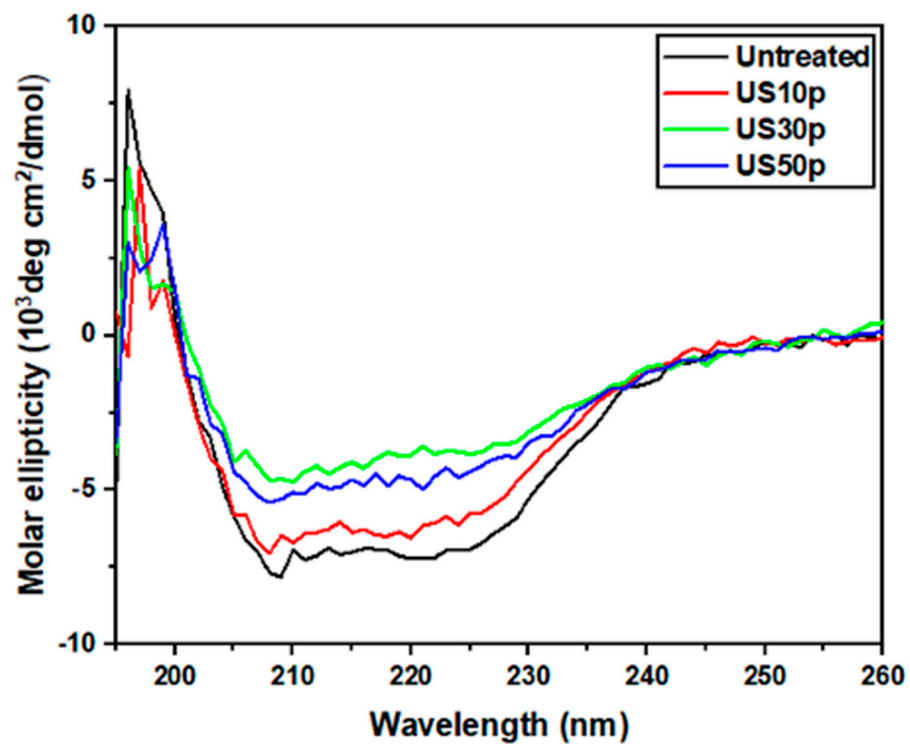

Figure S2. The Circular dichroism spectra of conventionally extracted and HIU-assisted extracted HPI.
